# Supplementary material for: Adaptive Goal Processes and Underlying Motives That Sustain Mental Wellbeing and New Year Exercise Resolutions
Source: MDPI journal article supplement (doi:10.3390/ijerph20020901), 2023-01-04
Supplement: s1 [file s1]

## **Supplementary Analyses.**

The following tables are included within this document:

1. **Table S1.** *Commitment, importance, and previous attempts as predictors of mental wellbeing at Times 1-4.*
2. **Table S2.** *Commitment, importance, and previous attempts as predictors of New Year resolution stickability at Times 2-4.*
3. **Table S3.** *Resolution orientation (approach vs. avoidance), resolution specificity (specific vs. general) as predictors of mental wellbeing at Times 1-4.*
4. **Table S4.** *Resolution orientation (approach vs. avoidance), resolution specificity (specific vs. general) as predictors of stickability at Times 2-4.*

**Table S1.** *Commitment, importance, and previous attempts as predictors of mental wellbeing at Times 1-4.*

| Variable   | T1 WEMWBS<br>( <i>n</i> = 296)     |                        |                |          |          | T2 WEMWBS<br>( <i>n</i> =178)    |                        |                 |          |          | T3 WEMWBS<br>( <i>n</i> = 133)   |                        |                |          |          | T4 WEMWBS<br>( <i>n</i> = 114)   |                        |                |          |          |
|------------|------------------------------------|------------------------|----------------|----------|----------|----------------------------------|------------------------|-----------------|----------|----------|----------------------------------|------------------------|----------------|----------|----------|----------------------------------|------------------------|----------------|----------|----------|
|            | $\beta$                            | <i>b</i> ( <i>SE</i> ) | 95%            | <i>t</i> | <i>p</i> | $\beta$                          | <i>b</i> ( <i>SE</i> ) | 95%             | <i>t</i> | <i>p</i> | $\beta$                          | <i>b</i> ( <i>SE</i> ) | 95%            | <i>t</i> | <i>p</i> | $\beta$                          | <i>b</i> ( <i>SE</i> ) | 95%            | <i>t</i> | <i>p</i> |
|            | CIs                                |                        |                |          |          | CIs                              |                        |                 |          |          | CIs                              |                        |                |          |          | CIs                              |                        |                |          |          |
| Age        | 0.086                              | 0.09<br>(0.04)         | -0.02,<br>0.13 | 1.45     | 0.147    | 0.16                             | 0.10<br>(0.05)         | 0.00,<br>0.20   | 2.01     | 0.046    | 0.20                             | 0.12<br>(0.05)         | 0.01,<br>0.23  | 2.24     | 0.027    | 0.15                             | 0.10<br>(0.06)         | -0.03,<br>0.22 | 1.49     | 0.139    |
| Gender     | -0.10                              | -0.10<br>(1.33)        | -4.87,<br>0.36 | -1.70    | 0.090    | -0.15                            | -3.77<br>(1.89)        | -7.49,<br>-0.04 | -1.99    | 0.048    | -0.03                            | -0.70<br>(2.20)        | -5.04,<br>3.70 | -0.32    | 0.752    | -0.10                            | -2.63<br>(2.59)        | -7.77,<br>2.51 | -1.01    | 0.313    |
| Commitment | 0.12                               | 0.12<br>(0.66)         | -0.35,<br>2.26 | 1.43     | 0.153    | 0.07                             | 0.61<br>(0.97)         | -1.31,<br>2.52  | 0.63     | 0.533    | -0.07                            | -0.65<br>(1.04)        | -2.72,<br>1.41 | -0.63    | 0.531    | 0.09                             | 0.89<br>(1.27)         | -1.63,<br>3.40 | 0.70     | 0.486    |
| Importance | -0.07                              | -0.07<br>(0.59)        | -1.68,<br>0.67 | -0.85    | 0.395    | 0.02                             | 0.11<br>(0.79)         | -1.44,<br>1.67  | 0.15     | 0.885    | 0.13                             | 0.98<br>(0.82)         | -0.65,<br>2.60 | 1.19     | 0.236    | -0.12                            | -0.91<br>(1.01)        | -2.91,<br>1.08 | -0.91    | 0.366    |
| Attempt    | 0.09                               | 0.09<br>(0.36)         | -0.17,<br>1.24 | 1.49     | 0.137    | -0.05                            | -0.28<br>(0.50)        | -1.28,<br>0.71  | -0.56    | 0.576    | 0.06                             | 0.33<br>(0.58)         | -0.81,<br>1.47 | 0.57     | 0.568    | -0.02                            | -0.14<br>(0.69)        | -1.51,<br>1.22 | -0.21    | 0.835    |
| Model:     | $R^2 = 0.44$ , $F(5,288) = 2.65^*$ |                        |                |          |          | $R^2 = 0.24$ , $F(5,170) = 1.99$ |                        |                 |          |          | $R^2 = 0.07$ , $F(5,127) = 2.04$ |                        |                |          |          | $R^2 = 0.04$ , $F(5,106) = 0.79$ |                        |                |          |          |

*Notes.*

\* =  $p < 0.05$ , \*\* =  $p < 0.01$ . T = Time, WEMWBS = Warwick-Edinburgh Mental Wellbeing Scale. Bold and underlined = significant at  $p = 0.05 / 4 = 0.0125$  (i.e., Bonferroni correction applied for multiple tests).

**Table S2.** *Commitment, importance, and previous attempts as predictors of New Year resolution stickability at Times 2-4.*

| Variable   | T2 Stickability<br>( <i>n</i> = 178)    |                        |         |          |          | T3 Stickability<br>( <i>n</i> = 134)   |                        |          |          |          | T4 Stickability<br>( <i>n</i> = 114)  |                        |         |          |          |
|------------|-----------------------------------------|------------------------|---------|----------|----------|----------------------------------------|------------------------|----------|----------|----------|---------------------------------------|------------------------|---------|----------|----------|
|            | $\beta$                                 | <i>b</i> ( <i>SE</i> ) | 95% CIs | <i>t</i> | <i>p</i> | $\beta$                                | <i>b</i> ( <i>SE</i> ) | 95% CIs  | <i>t</i> | <i>p</i> | $\beta$                               | <i>b</i> ( <i>SE</i> ) | 95% CIs | <i>t</i> | <i>p</i> |
| Age        | 0.14                                    | 0.05,                  | 0.00,   | 2.04     | 0.043    | 0.17                                   | 0.05                   | -0.00,   | 1.95     | 0.054    | 0.14                                  | 0.05                   | -0.02,  | 1.49     | 0.140    |
|            |                                         | 0.02                   | 0.09    |          |          |                                        | (0.03)                 | 0.10     |          |          |                                       | (0.03)                 | 0.11    |          |          |
| Gender     | -0.12                                   | -1.59,                 | -3.33,  | -1.81    | 0.072    | -0.18                                  | -2.40                  | -4.53, - | -2.24    | 0.027    | -0.08                                 | -1.10                  | -3.60,  | -0.87    | 0.387    |
|            |                                         | 0.88                   | 0.14    |          |          |                                        | (1.07)                 | 0.28     |          |          |                                       | (1.26)                 | 1.41    |          |          |
| Commitment | 0.35                                    | 1.65,                  | 0.76,   | 3.65     | < 0.001  | 0.14                                   | 0.66                   | -0.35,   | 1.30     | 0.195    | 0.12                                  | 0.61                   | -0.61,  | 0.99     | 0.325    |
|            |                                         | 0.45                   | 2.54    |          |          |                                        | (0.51)                 | 1.67     |          |          |                                       | (0.62)                 | 1.84    |          |          |
| Importance | 0.04                                    | 0.14,                  | -0.58,  | 0.39     | 0.697    | 0.08                                   | 0.30                   | -0.49,   | 0.76     | 0.451    | 0.02                                  | 0.10                   | -0.88,  | 0.20     | 0.846    |
|            |                                         | 0.37                   | 0.87    |          |          |                                        | (0.40)                 | 1.10     |          |          |                                       | (0.49)                 | 1.07    |          |          |
| Attempt    | 0.17                                    | 0.52,                  | 0.06,   | 2.24     | 0.027    | 0.13                                   | 0.40                   | -0.16,   | 1.41     | 0.162    | 0.19                                  | 0.63                   | -0.04,  | 1.87     | 0.064    |
|            |                                         | 0.23                   | 0.99    |          |          |                                        | (0.28)                 | 0.95     |          |          |                                       | (0.34)                 | 1.29    |          |          |
| Model:     | $R^2 = 0.54$ , $F(5,170) = 13.70^{***}$ |                        |         |          |          | $R^2 = 0.19$ , $F(5,127) = 5.79^{***}$ |                        |          |          |          | $R^2 = 0.14$ , $F(5,106) = 3.43^{**}$ |                        |         |          |          |

*Notes.*

\* =  $p < 0.05$ , \*\* =  $p < 0.01$ . \*\*\* =  $p < 0.001$ . T = Time. Bold and underlined = significant at  $p = 0.05 / 3 = 0.0167$  (i.e., Bonferroni correction applied for multiple tests).

**Table S3.** Resolution orientation (approach vs. avoidance), resolution specificity (specific vs. general) as predictors of mental wellbeing at Times 1-4.

| Variable    | T1 WEMWBS                          |                        |        |          |          | T2 WEMWBS                             |                        |        |          |          | T3 WEMWBS                        |                        |        |          |          | T4 WEMWBS                        |                        |        |          |          |
|-------------|------------------------------------|------------------------|--------|----------|----------|---------------------------------------|------------------------|--------|----------|----------|----------------------------------|------------------------|--------|----------|----------|----------------------------------|------------------------|--------|----------|----------|
|             | (n = 294)                          |                        |        |          |          | (n =176)                              |                        |        |          |          | (n = 133)                        |                        |        |          |          | (n = 112)                        |                        |        |          |          |
|             | $\beta$                            | <i>b</i> ( <i>SE</i> ) | 95%    | <i>t</i> | <i>p</i> | $\beta$                               | <i>b</i> ( <i>SE</i> ) | 95%    | <i>t</i> | <i>p</i> | $\beta$                          | <i>b</i> ( <i>SE</i> ) | 95%    | <i>t</i> | <i>p</i> | $\beta$                          | <i>b</i> ( <i>SE</i> ) | 95%    | <i>t</i> | <i>p</i> |
|             | CIs                                |                        |        |          |          | CIs                                   |                        |        |          |          | CIs                              |                        |        |          |          | CIs                              |                        |        |          |          |
| Age         | 0.11                               | 0.07                   | -0.01, | 1.84     | 0.067    | 0.18                                  | 0.11                   | 0.02,  | 2.37     | 0.019    | 0.26                             | 0.15                   | 0.05,  | 2.91     | 0.004    | 0.17                             | 0.11                   | -0.02, | 1.73     | 0.086    |
|             |                                    | (0.04)                 | 0.14   |          |          |                                       | (0.05)                 | 0.20   |          |          |                                  | (0.05)                 | 0.26   |          |          |                                  | (0.06)                 | 0.23   |          |          |
| Gender      | -0.12                              | -2.72                  | -5.36, | -2.02    | 0.045    | -0.13                                 | -3.39                  | -7.21, | -1.75    | 0.082    | -0.01                            | -0.23                  | -4.84, | -0.10    | 0.922    | -0.06                            | -1.50                  | -6.79, | -0.56    | 0.575    |
|             |                                    | (1.35)                 | -0.67  |          |          |                                       | (1.94)                 | 0.43   |          |          |                                  | (2.33)                 | 4.38   |          |          |                                  | (2.67)                 | 3.79   |          |          |
| Resolution  | -0.10                              | -4.05                  | -8.88, | -1.65    | 0.101    | 0.01                                  | 0.56                   | -7.01, | 0.15     | 0.884    | 0.05                             | 2.60                   | -6.28, | 0.58     | 0.563    | 0.05                             | 2.86                   | -7.86, | 0.53     | 0.598    |
| Orientation |                                    | (2.45)                 | 0.79   |          |          |                                       | (3.83)                 | 8.13   |          |          |                                  | (4.49)                 | 11.49  |          |          |                                  | (5.41)                 | 13.58  |          |          |
| Resolution  | -0.09                              | -1.67                  | -3.87, | -1.49    | 0.137    | -0.17                                 | -3.36                  | -6.21, | -2.32    | 0.021    | -0.05                            | -0.87                  | -4.15, | -0.53    | 0.598    | -0.14                            | -2.81                  | -6.73, | -1.42    | 0.158    |
| Specificity |                                    | (1.12)                 | 0.53   |          |          |                                       | (1.45)                 | -0.50  |          |          |                                  | (1.66)                 | 2.40   |          |          |                                  | (1.98)                 | 1.11   |          |          |
| Model:      | $R^2 = 0.04$ , $F(4,289) = 2.87^*$ |                        |        |          |          | $R^2 = 0.08$ , $F(4,171) = 3.75^{**}$ |                        |        |          |          | $R^2 = 0.07$ , $F(4,128) = 2.26$ |                        |        |          |          | $R^2 = 0.05$ , $F(4,107) = 1.42$ |                        |        |          |          |

Notes.

\* =  $p < 0.05$ , \*\* =  $p < 0.01$ , \*\*\* =  $p < 0.001$ . T = Time, WEMWBS = Warwick-Edinburgh Mental Wellbeing Scale. Bold = significant at  $p = 0.05 / 4 = 0.0125$  (i.e., Bonferroni correction applied for multiple tests).

**Table S4.** Resolution orientation (approach vs. avoidance), resolution specificity (specific vs. general) as predictors of stickability at Times 2-4.

| Variable                    | T2 Resolution Stickability<br>( <i>n</i> = 176) |                        |                 |          |          | T3 Resolution Stickability<br>( <i>n</i> = 133) |                        |                 |          |          | T4 Resolution Stickability<br>( <i>n</i> = 112) |                        |                 |          |          |
|-----------------------------|-------------------------------------------------|------------------------|-----------------|----------|----------|-------------------------------------------------|------------------------|-----------------|----------|----------|-------------------------------------------------|------------------------|-----------------|----------|----------|
|                             | $\beta$                                         | <i>b</i> ( <i>SE</i> ) | 95% CIs         | <i>t</i> | <i>p</i> | $\beta$                                         | <i>b</i> ( <i>SE</i> ) | 95% CIs         | <i>t</i> | <i>p</i> | $\beta$                                         | <i>b</i> ( <i>SE</i> ) | 95% CIs         | <i>t</i> | <i>p</i> |
| Age                         | 0.22                                            | 0.07<br>(0.02)         | 0.03,<br>0.12   | 3.02     | 0.003    | 0.24                                            | 0.08,<br>0.03          | 0.02,<br>0.13   | 2.85     | 0.005    | 0.28                                            | 0.09<br>(0.03)         | 0.03,<br>0.15   | 3.02     | 0.003    |
| Gender                      | -0.18                                           | -2.41<br>(1.03)        | -4.34,<br>-0.38 | -2.34    | 0.021    | -0.19                                           | -2.46,<br>1.18         | -4.79,<br>-0.13 | -2.09    | 0.039    | -0.07                                           | -0.95<br>(1.32)        | -3.56,<br>1.66  | -0.72    | 0.472    |
| Resolution Ori-<br>entation | -0.13                                           | -3.54<br>(2.04)        | -7.76,<br>0.48  | -1.74    | 0.084    | 0.10                                            | 2.46,<br>2.27          | -2.04,<br>6.95  | 1.08     | 0.281    | 0.06                                            | 1.67,<br>2.67          | -3.63,<br>6.96  | 0.62     | 0.534    |
| Resolution Spec-<br>ificity | -0.12                                           | -1.20<br>(0.77)        | -2.72,<br>0.31  | -1.57    | 0.119    | 0.00                                            | 0.01,<br>0.84          | -1.64,<br>1.67  | 0.02     | 0.987    | -0.24                                           | -2.50,<br>0.98         | -4.44,<br>-0.56 | -2.56    | 0.012    |
| Model:                      | $R^2 = 0.10$ , $F(4, 171) = 4.58^{**}$          |                        |                 |          |          | $R^2 = 0.12$ , $F(4, 128) = 4.38^{**}$          |                        |                 |          |          | $R^2 = 0.13$ , $F(4, 107) = 3.96^{***}$         |                        |                 |          |          |

Notes.

\* =  $p < 0.05$ , \*\* =  $p < 0.01$ . \*\*\* =  $p < 0.001$ . T = Time. Bold = significant at  $p = 0.05 / 3 = 0.0167$  (i.e., Bonferroni correction applied for multiple tests).
